# Supplementary material
Source: PubMed Central journal article supplement (PMC3215897)

Early Passage

Senescent

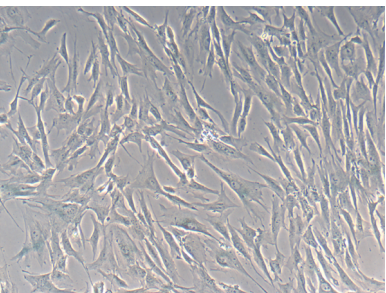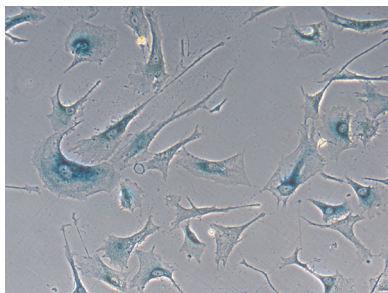

BJ

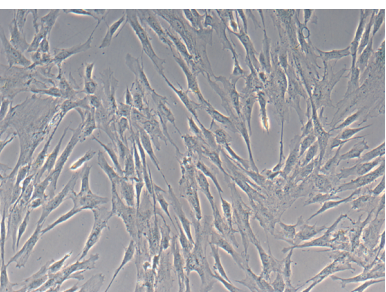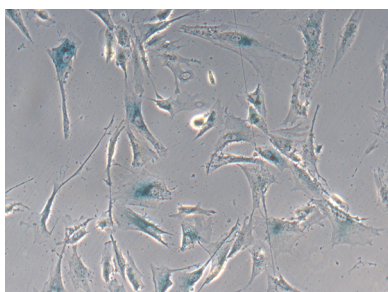

WS1

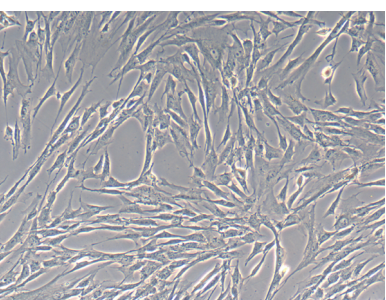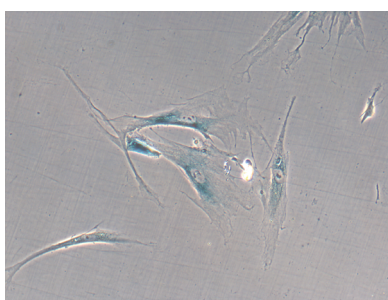

LF1

Supplement: NIHMS325768-supplement-Supp_Fig_S1.pdf [file NIHMS325768-supplement-Supp_Fig_S1.pdf]

**A**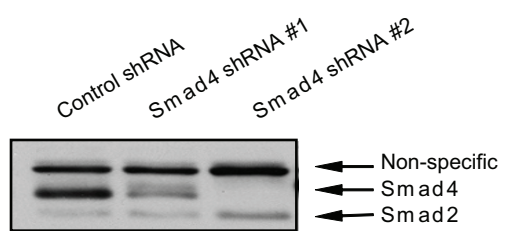**B**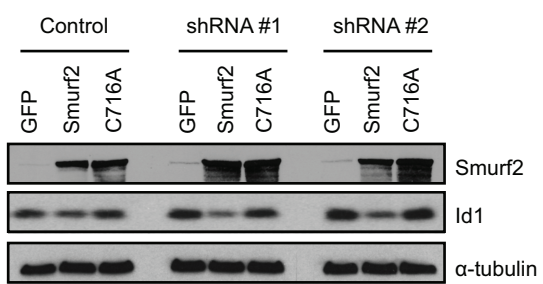

Supplement: NIHMS325768-supplement-Supp_Fig_S2.pdf [file NIHMS325768-supplement-Supp_Fig_S2.pdf]

**A**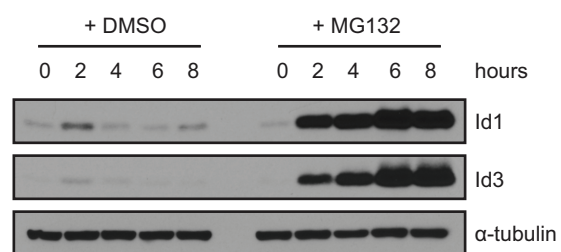**B**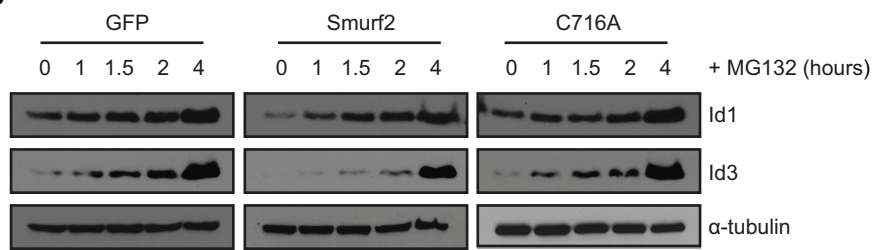

Supplement: NIHMS325768-supplement-Supp_Fig_S3.pdf [file NIHMS325768-supplement-Supp_Fig_S3.pdf]

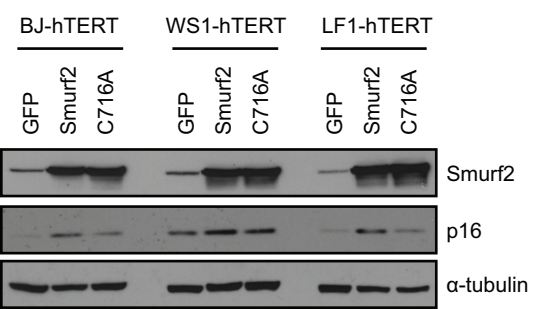

Supplement: NIHMS325768-supplement-Supp_Fig_S4.pdf [file NIHMS325768-supplement-Supp_Fig_S4.pdf]

**A**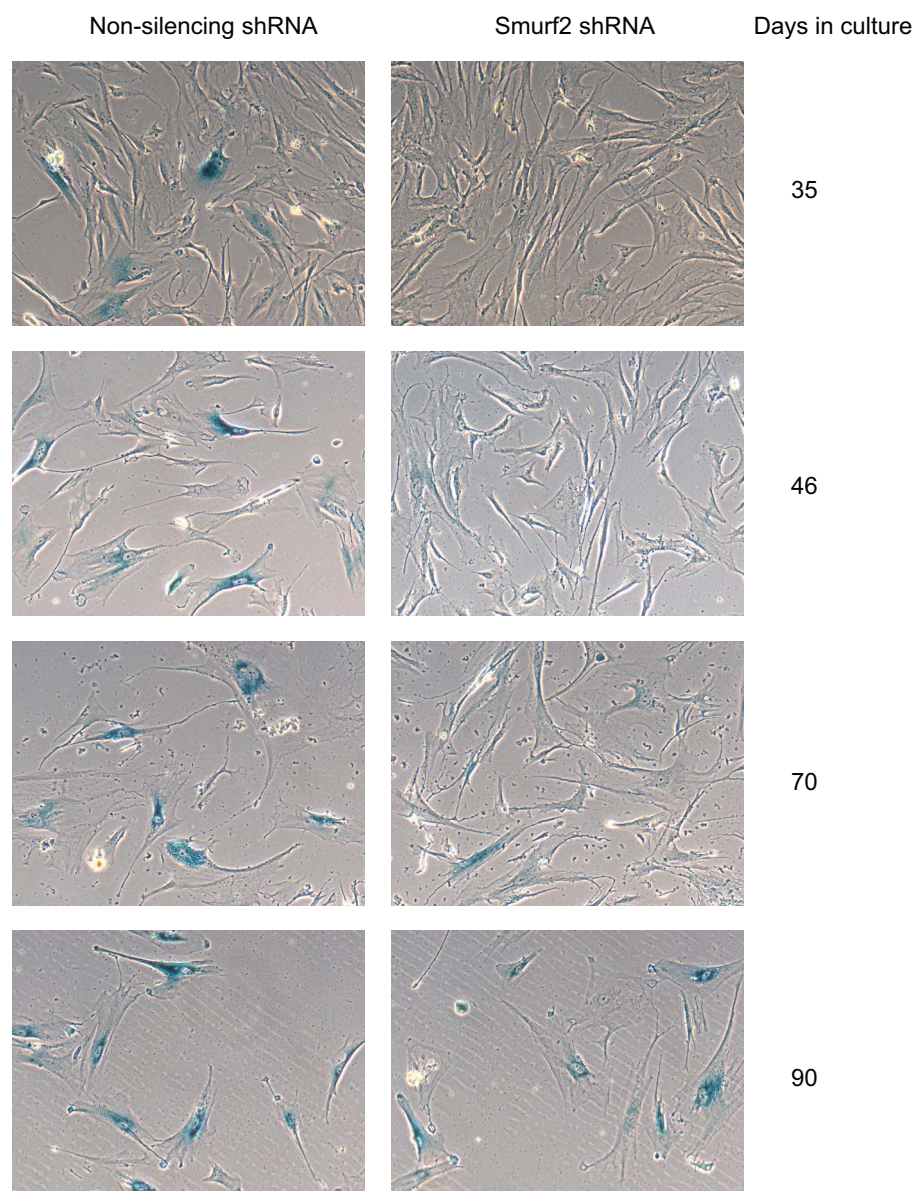**B**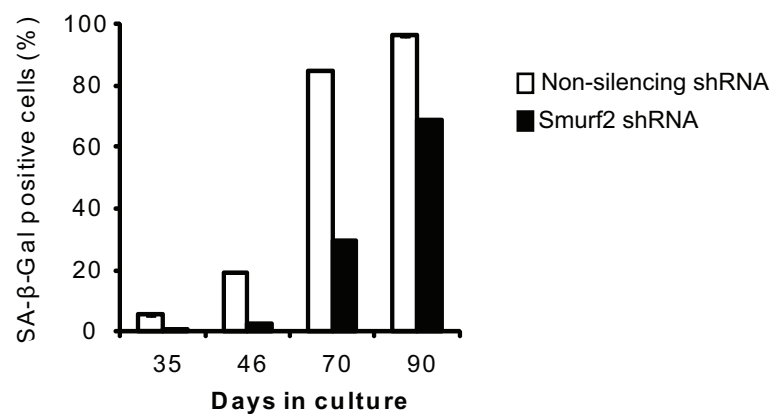

Supplement: NIHMS325768-supplement-Supp_Fig_S5.pdf [file NIHMS325768-supplement-Supp_Fig_S5.pdf]
